# Supplementary material for: Linzagolix therapy versus a placebo in patients with endometriosis-associated pain: a prospective, randomized, double-blind, Phase 3 study (EDELWEISS 3)
Source: PubMed Central journal article supplement (PMC11144970; doi:10.1093/humrep/deae076), 2024-04-22
Supplement: deae076_supplementary_figure_s1.pdf [file deae076_supplementary_figure_s1.pdf]

**A** Change from Baseline to Month 6 for dysmenorrhea (VRS) – Full analysis set.

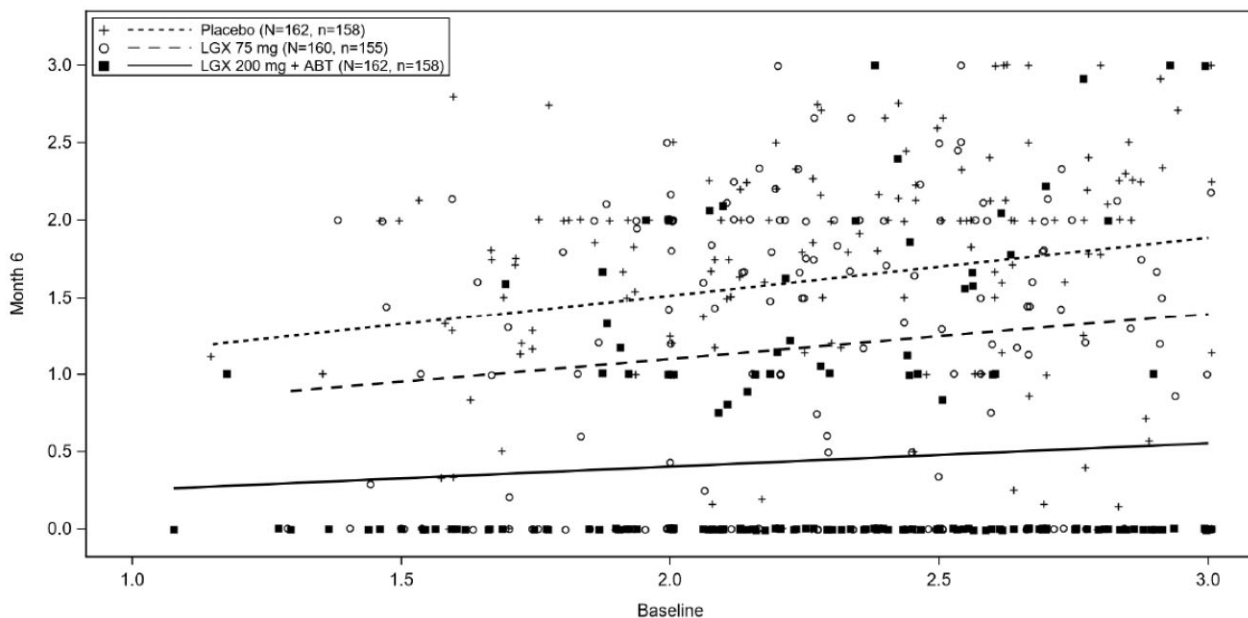

LGX: LINZAGOLIX; ABT: Add-Back Therapy; VRS: Verbal Rating Scale.

**B** Change from Baseline to Month 6 for non-menstrual pelvic pain (VRS) – Full analysis set.

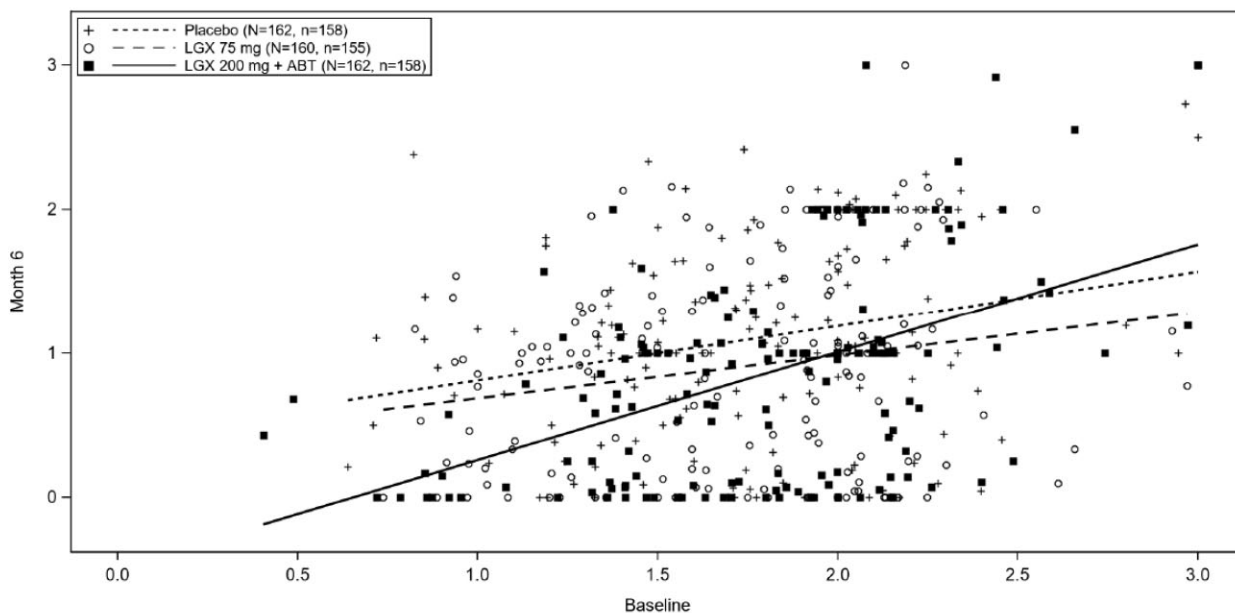

LGX: LINZAGOLIX; ABT: Add-Back Therapy; VRS: Verbal Rating Scale.

**Supplementary Figure S1.** Month 6 scores: mean of daily assessments in the last 28 days prior to Month 6 or discontinuation. (A) Dysmenorrhea and (B) Non-menstrual pelvic pain. Due to the large sample size and discreteness of outcomes, a small random variation was added to avoid overplotting and/or random sub-sampling.
